# Supplementary material
Source: publisher site journal article supplement (https://www.dovepress.com/article/supplementary_file/614212/614212%20Appendix%201._2_1.docx)
Supplement: Supplementary file 1 [file 614212%20Appendix%201._2_1.docx]

Database search formula

| Databases | Search formula | Search formula (English version) |
| --- | --- | --- |
| China National Knowledge Infrastructure (CNKI) | (COPD + 慢性阻塞性肺疾病 + 慢阻肺) * (教育 + 健康教育 + 健康促进 + 患者教育 + 自我管理教育) * (指南 + 证据总结 + 专家共识 + 系统评价 + Meta分析) | (COPD + chronic obstructive pulmonary disease + chronic obstructive pulmonary disease) AND (education + health education + health promotion + patient education + self-management education) AND (guideline + evidence summary + expert consensus + systematic review + meta-analysis) |
| Wanfang Data | (COPD OR 慢性阻塞性肺疾病 OR 慢阻肺) AND (教育 OR 健康教育 OR 健康促进 OR 患者教育 OR 自我管理教育) AND (指南 OR 证据总结 OR 专家共识 OR 系统评价 OR Meta分析) | (COPD OR chronic obstructive pulmonary disease OR chronic obstructive pulmonary disease) AND (education OR health education OR health promotion OR patient education OR self-management education) AND (guideline OR evidence summary OR expert consensus OR systematic review OR meta-analysis) |
| VIP Database (VIP) | (COPD OR 慢性阻塞性肺疾病 OR 慢阻肺) AND (教育 OR 健康教育 OR 健康促进 OR 患者教育 OR 自我管理教育) AND (指南 OR 证据总结 OR 专家共识 OR 系统评价 OR Meta分析) | (COPD OR chronic obstructive pulmonary disease OR chronic obstructive pulmonary disease) AND (education OR health education OR health promotion OR patient education OR self-management education) AND (guideline OR evidence summary OR expert consensus OR systematic review OR meta-analysis) |
| Sinomed | (COPD OR 慢性阻塞性肺疾病 OR 慢阻肺) AND (教育 OR 健康教育 OR 健康促进 OR 患者教育 OR 自我管理教育) AND (指南 OR 证据总结 OR 专家共识 OR 系统评价 OR Meta分析) | (COPD OR chronic obstructive pulmonary disease OR chronic obstructive pulmonary disease) AND (education OR health education OR health promotion OR patient education OR self-management education) AND (guideline OR evidence summary OR expert consensus OR systematic review OR meta-analysis) |
| UPTODATE | 慢性阻塞性肺疾病 | chronic obstructive pulmonary disease |
| Medlive | 慢性阻塞性肺疾病 | chronic obstructive pulmonary disease |
| Web of science (WOS) | (Chronic Obstructive Pulmonary Disease OR COPD OR Chronic Obstructive Lung Disease OR COAD OR Chronic Airflow Obstruction) AND (Education OR Health Education OR Health Promotion OR Patient Education) AND (Guideline OR Evidence Summary OR Systematic Review OR Best Practice OR Consensus OR Meta-Analysis) | (Chronic Obstructive Pulmonary Disease OR COPD OR Chronic Obstructive Lung Disease OR COAD OR Chronic Airflow Obstruction) AND (Education OR Health Education OR Health Promotion OR Patient Education) AND (Guideline OR Evidence Summary OR Systematic Review OR Best Practice OR Consensus OR Meta-Analysis) |
| Cochrane Library | (Chronic Obstructive Pulmonary Disease OR COPD OR Chronic Obstructive Lung Disease OR COAD OR Chronic Airflow Obstruction) AND  (Education OR Health Education OR Health Promotion OR Patient Education) AND (Guideline OR Evidence Summary OR Systematic Review OR Best Practice OR Consensus OR Meta-Analysis) | (Chronic Obstructive Pulmonary Disease OR COPD OR Chronic Obstructive Lung Disease OR COAD OR Chronic Airflow Obstruction) AND  (Education OR Health Education OR Health Promotion OR Patient Education) AND (Guideline OR Evidence Summary OR Systematic Review OR Best Practice OR Consensus OR Meta-Analysis) |
| Pubmed | (Chronic Obstructive Pulmonary Disease OR COPD OR Chronic Obstructive Lung Disease OR COAD OR Chronic Airflow Obstruction) AND  (Education OR Health Education OR Health Promotion OR Patient Education) AND (Guideline OR Evidence Summary OR Systematic Review OR Best Practice OR Consensus OR Meta-Analysis) | (Chronic Obstructive Pulmonary Disease OR COPD OR Chronic Obstructive Lung Disease OR COAD OR Chronic Airflow Obstruction) AND  (Education OR Health Education OR Health Promotion OR Patient Education) AND (Guideline OR Evidence Summary OR Systematic Review OR Best Practice OR Consensus OR Meta-Analysis) |
| Embase | (Chronic Obstructive Pulmonary Disease OR COPD OR Chronic Obstructive Lung Disease OR COAD OR Chronic Airflow Obstruction) AND  (Education OR Health Education OR Health Promotion OR Patient Education) AND (Guideline OR Evidence Summary OR Systematic Review OR Best Practice OR Consensus OR Meta-Analysis) | (Chronic Obstructive Pulmonary Disease OR COPD OR Chronic Obstructive Lung Disease OR COAD OR Chronic Airflow Obstruction) AND  (Education OR Health Education OR Health Promotion OR Patient Education) AND (Guideline OR Evidence Summary OR Systematic Review OR Best Practice OR Consensus OR Meta-Analysis) |
| BMJ Best Practice | Chronic Obstructive Pulmonary Disease | Chronic Obstructive Pulmonary Disease |
| National Institute for Health and Care Excellence (Nice) | Chronic Obstructive Pulmonary Disease | Chronic Obstructive Pulmonary Disease |
| Registered Nurses’ Association of Ontario (RNAO) | Chronic Obstructive Pulmonary Disease | Chronic Obstructive Pulmonary Disease |
| Guidelines International Network (GIN) | Chronic Obstructive Pulmonary Disease | Chronic Obstructive Pulmonary Disease |
| American Thoracic Society (ATS) | Chronic Obstructive Pulmonary Disease | Chronic Obstructive Pulmonary Disease |
| European Respiratory Society (ERS) | Chronic Obstructive Pulmonary Disease | Chronic Obstructive Pulmonary Disease |
| Global Initiative for Chronic Obstructive Lung Disease (GOLD) | Chronic Obstructive Pulmonary Disease | Chronic Obstructive Pulmonary Disease |

Explanation: In Chinese, “慢性阻塞性肺疾病” (full name) and “慢阻肺” (abbreviation) denote the same disease. Both translate to “chronic obstructive pulmonary disease” in English.
